# Supplementary material for: Complete Chloroplast Genomes of Four Oaks from the Section Cyclobalanopsis Improve the Phylogenetic Analysis and Understanding of Evolutionary Processes in the Genus Quercus
Source: MDPI journal article supplement (doi:10.3390/genes15020230), 2024-02-11
Supplement: s1 [file s1]

# Complete Chloroplast Genomes of Four Oaks from the Section *Cyclobalanopsis* Improve the Phylogenetic Analysis and Understanding of Evolutionary Processes in the Genus *Quercus*

Ling-Ling Wang <sup>1,2,†</sup>, Yu Li <sup>2,†</sup>, Si-Si Zheng <sup>2</sup>, Gregor Kozłowski <sup>2,3,4</sup>, Jin Xu <sup>1,\*</sup>  
and Yi-Gang Song <sup>2,\*</sup>

<sup>1</sup> School of Ecological Technology and Engineering, Shanghai Institute of Technology, Shanghai 201418, China; llwang0615@163.com

<sup>2</sup> Eastern China Conservation Centre for Wild Endangered Plant Resources, Shanghai Chenshan Botanical Garden, Shanghai 201602, China; liyu980625@163.com (Y.L.); zhengsisi1228@163.com (S.-S.Z.); gregor.kozłowski@unifr.ch (G.K.)

<sup>3</sup> Department of Biology and Botanic Garden, University of Fribourg, 1700 Fribourg, Switzerland

<sup>4</sup> Natural History Museum Fribourg, 1700 Fribourg, Switzerland

\* Correspondence: xujin@sit.edu.cn (J.X.); ygsong@cemps.ac.cn (Y.-G.S.)

† These authors contributed equally to this work.

# Supplementary

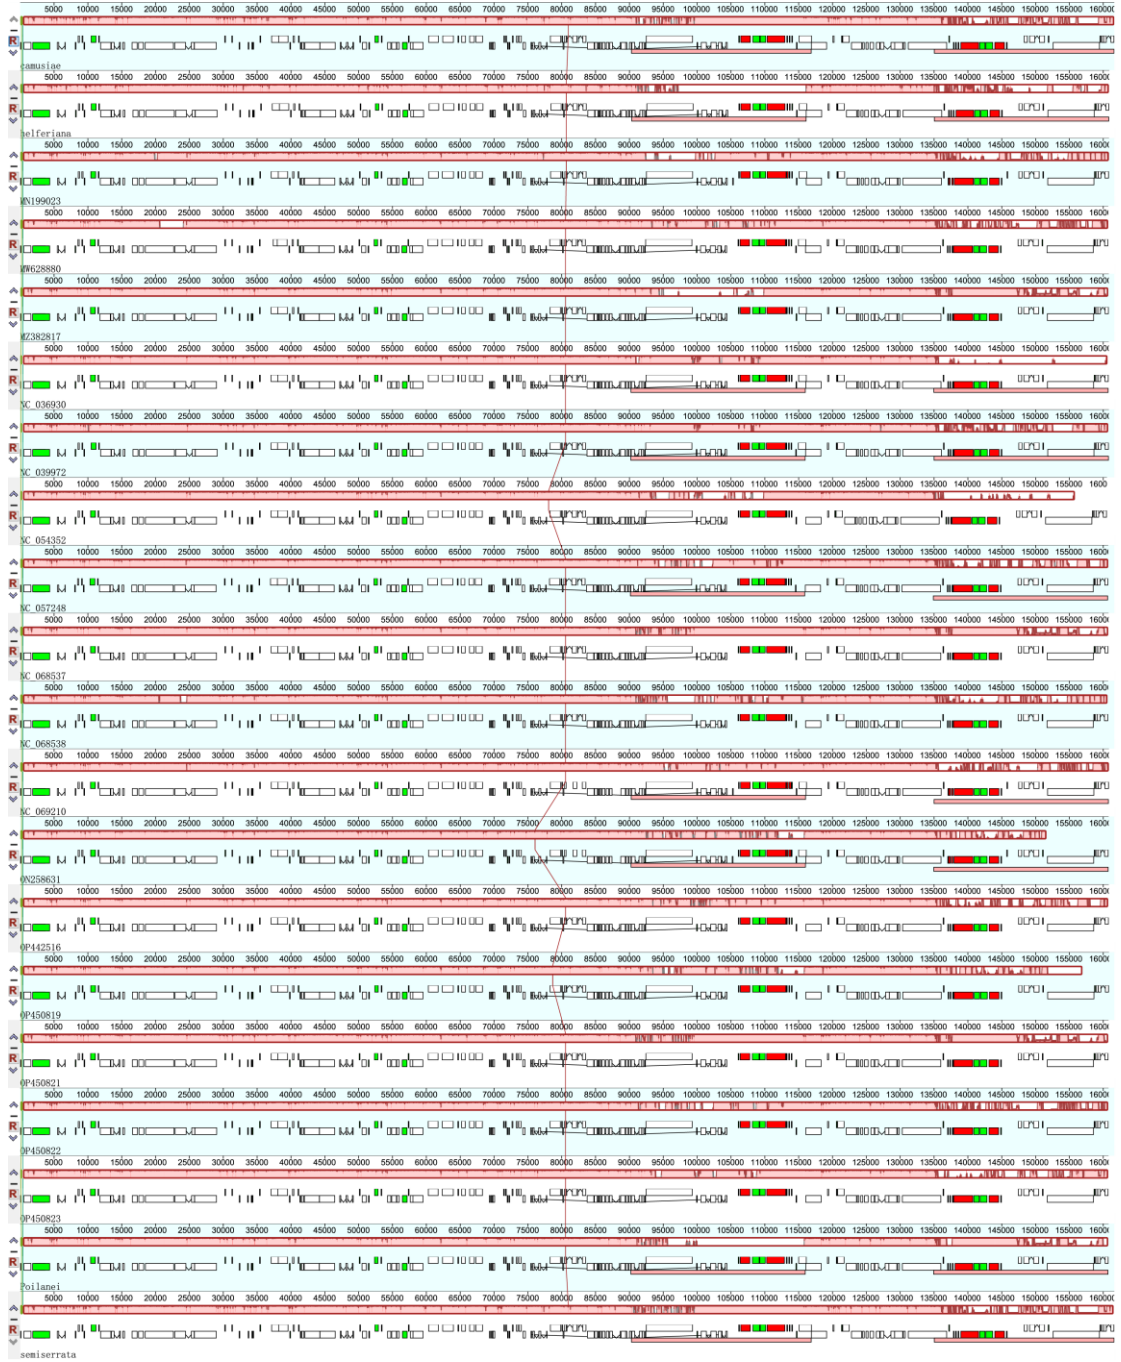

**Figure S1.** Mauve alignment of 20 chloroplast genomes of *Quercus* section *Cyclobalanopsis*. The box structure below the genome represents the corresponding gene annotation information: the white rectangle represents protein coding genes (PCGs), the red rectangle represents ribosomal RNA genes (rRNAs), and the green rectangle represents transfer RNA genes (tRNAs). The introns are connected by line segments.

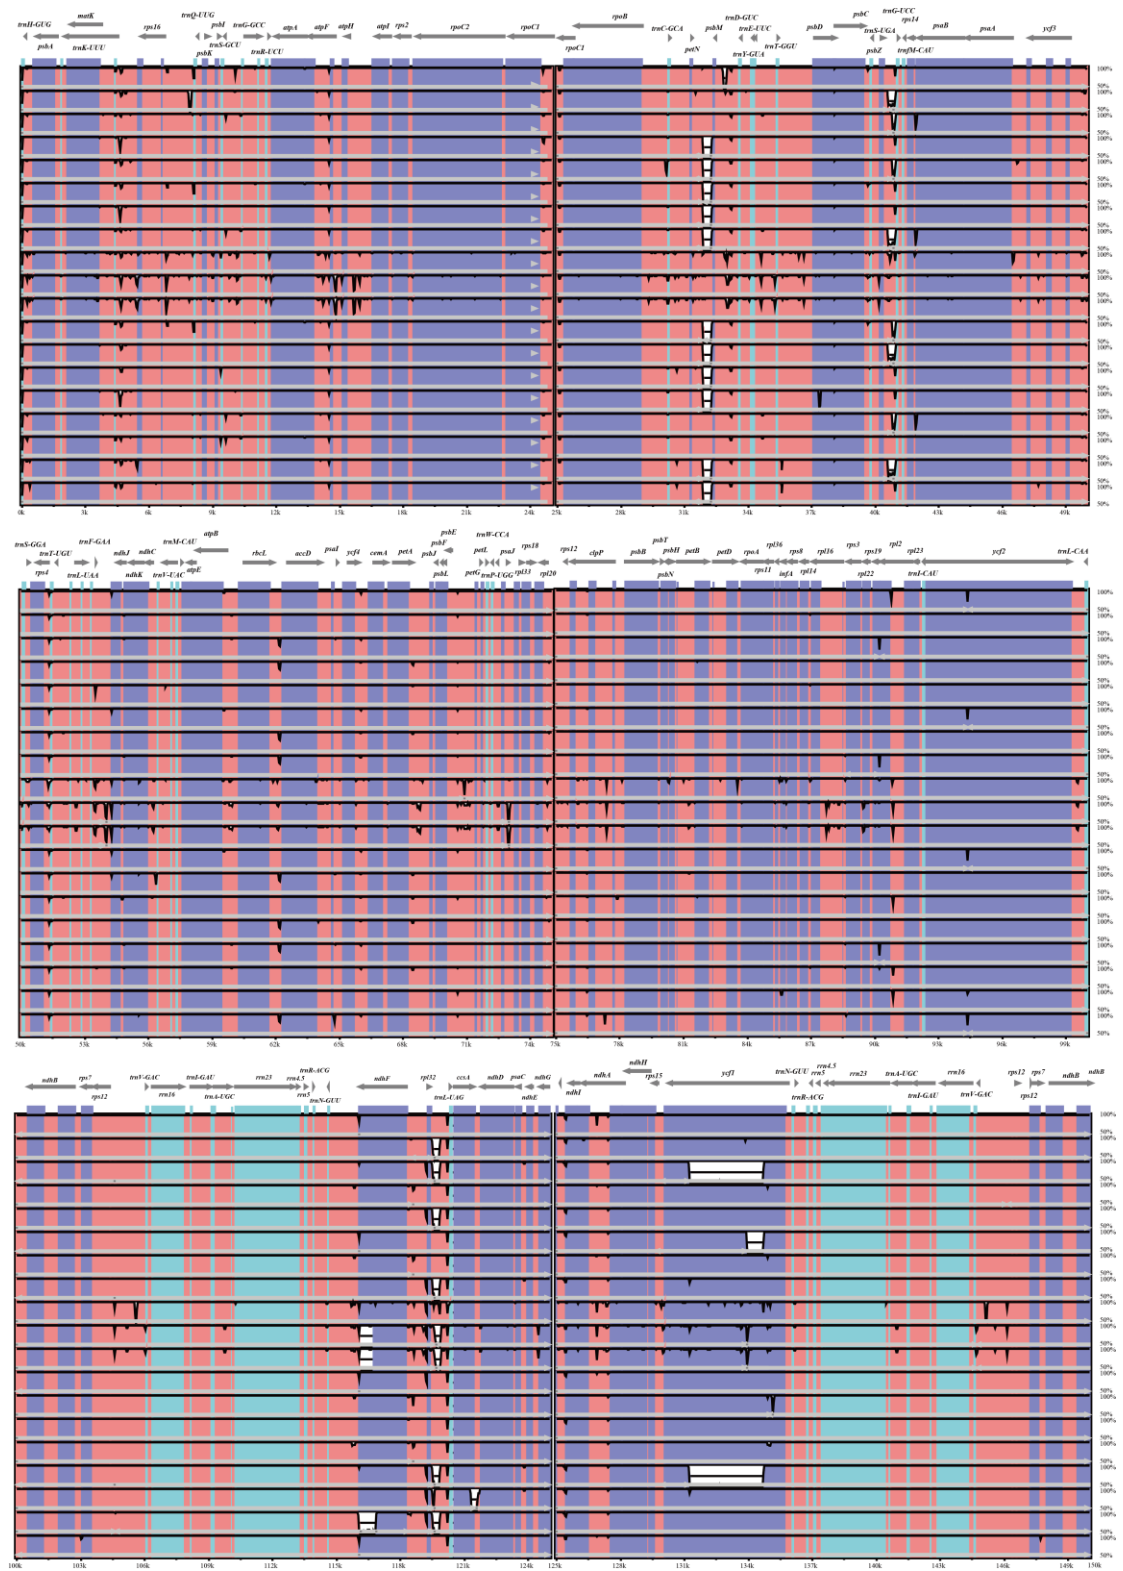



|                       |                  |               |    |    |    |    |    |    |
|-----------------------|------------------|---------------|----|----|----|----|----|----|
| <i>Q. helferiana</i>  | Trinucleotides   | AAG/CTT       | 1  | 0  | 1  | 0  | 0  | 1  |
|                       |                  | AAT/ATT       | 5  | 3  | 2  | 0  | 2  | 3  |
|                       |                  | AAAT/ATTT     | 6  | 6  | 0  | 0  | 5  | 1  |
|                       | Tetranucleotides | AATG/ATTC     | 1  | 1  | 0  | 0  | 1  | 0  |
|                       |                  | AATT/AATT     | 2  | 2  | 0  | 0  | 1  | 1  |
|                       |                  | AAAAT/ATTTT   | 1  | 0  | 1  | 0  | 0  | 1  |
|                       | Pentanucleotides | AATAT/ATATT   | 0  | 0  | 0  | 0  | 0  | 0  |
|                       |                  | AATGC/ATTGC   | 2  | 0  | 0  | 2  | 2  | 0  |
|                       | Mononucleotides  | A/T           | 78 | 58 | 16 | 4  | 58 | 20 |
|                       |                  | C/G           | 4  | 3  | 1  | 0  | 1  | 3  |
|                       | Dinucleotides    | AG/CT         | 3  | 1  | 0  | 2  | 2  | 1  |
|                       |                  | AT/AT         | 14 | 13 | 1  | 0  | 11 | 3  |
| <i>Q. camusiae</i>    | Trinucleotides   | AAG/CTT       | 1  | 0  | 1  | 0  | 0  | 1  |
|                       |                  | AAT/ATT       | 7  | 4  | 1  | 2  | 3  | 4  |
|                       |                  | AAAT/ATTT     | 7  | 6  | 1  | 0  | 5  | 2  |
|                       | Tetranucleotides | AATG/ATTC     | 1  | 1  | 0  | 0  | 1  | 0  |
|                       |                  | AATT/AATT     | 2  | 2  | 0  | 0  | 1  | 1  |
|                       |                  | AAAAT/ATTTT   | 1  | 0  | 1  | 0  | 0  | 1  |
|                       | Pentanucleotides | AATAT/ATATT   | 2  | 1  | 1  | 0  | 1  | 1  |
|                       |                  | AATGC/ATTGC   | 2  | 0  | 0  | 2  | 2  | 0  |
|                       | Hexanucleotide   | ACCATG/ATGGTC | 1  | 1  | 0  | 0  | 0  | 1  |
|                       | Mononucleotides  | A/T           | 78 | 58 | 16 | 4  | 58 | 20 |
|                       |                  | C/G           | 4  | 3  | 1  | 0  | 1  | 3  |
|                       | Dinucleotides    | AG/CT         | 3  | 1  | 0  | 2  | 2  | 1  |
| AT/AT                 |                  | 14            | 13 | 1  | 0  | 11 | 3  |    |
| <i>Q. semiserrata</i> | Trinucleotides   | AAG/CTT       | 1  | 0  | 1  | 0  | 0  | 1  |
|                       |                  | AAT/ATT       | 7  | 4  | 1  | 2  | 3  | 4  |
|                       |                  | AAAT/ATTT     | 7  | 6  | 1  | 0  | 5  | 2  |
|                       | Tetranucleotides | AATG/ATTC     | 1  | 1  | 0  | 0  | 1  | 0  |
|                       |                  | AATT/AATT     | 2  | 2  | 0  | 0  | 1  | 1  |
|                       |                  | AAAAT/ATTTT   | 1  | 0  | 1  | 0  | 0  | 1  |
|                       | Pentanucleotides | AATAT/ATATT   | 2  | 1  | 1  | 0  | 1  | 1  |
|                       |                  | AATGC/ATTGC   | 2  | 0  | 0  | 2  | 2  | 0  |
|                       | Hexanucleotides  | ACCATG/ATGGTC | 1  | 1  | 0  | 0  | 0  | 1  |

**Table S2a.** Codon parameter characterization of chloroplast genome of *Q. poilanei*. Abbreviations: ENC (Effective Number of Codon).

| Gene name   | <i>Q. poilanei</i> |        |        |        |         |         |         |            |       |       |
|-------------|--------------------|--------|--------|--------|---------|---------|---------|------------|-------|-------|
|             | T3s                | C3s    | A3s    | G3s    | GC1 (%) | GC2 (%) | GC3 (%) | GC_all (%) | GC3s  | ENC   |
| <i>psbA</i> | 0.5493             | 0.2368 | 0.2937 | 0.0811 | 49.44   | 43.5    | 31.64   | 41.53      | 0.272 | 40.77 |
| <i>matK</i> | 0.4848             | 0.1725 | 0.4419 | 0.1954 | 40.59   | 32.87   | 28.51   | 33.99      | 0.27  | 50.79 |
| <i>atpA</i> | 0.4523             | 0.1683 | 0.4276 | 0.1697 | 55.31   | 39.76   | 28.35   | 41.14      | 0.267 | 48.23 |
| <i>atpF</i> | 0.3836             | 0.1849 | 0.4444 | 0.2538 | 45.41   | 35.14   | 35.14   | 38.56      | 0.333 | 55.04 |
| <i>atpI</i> | 0.5142             | 0.1698 | 0.4115 | 0.0904 | 48.79   | 36.29   | 23.79   | 36.29      | 0.213 | 43.56 |

|              |        |        |        |        |       |       |       |       |       |       |
|--------------|--------|--------|--------|--------|-------|-------|-------|-------|-------|-------|
| <i>rps2</i>  | 0.4921 | 0.1257 | 0.4477 | 0.1824 | 43.04 | 40.93 | 27.43 | 37.13 | 0.23  | 47.35 |
| <i>rpoC2</i> | 0.4446 | 0.1621 | 0.4612 | 0.1961 | 45.47 | 37.07 | 28.88 | 37.14 | 0.269 | 50.3  |
| <i>rpoC1</i> | 0.4596 | 0.1636 | 0.4366 | 0.2119 | 50.07 | 38.07 | 30.6  | 39.58 | 0.281 | 51.99 |
| <i>rpoB</i>  | 0.4413 | 0.1385 | 0.4515 | 0.2264 | 50.37 | 37.62 | 29.8  | 39.26 | 0.275 | 50.09 |
| <i>psbD</i>  | 0.4800 | 0.2233 | 0.3525 | 0.1478 | 52.26 | 43.22 | 34.75 | 43.41 | 0.305 | 48.25 |
| <i>rps14</i> | 0.3816 | 0.1316 | 0.4878 | 0.2208 | 46.53 | 47.52 | 30.69 | 41.58 | 0.281 | 38.42 |
| <i>psaB</i>  | 0.4968 | 0.1581 | 0.3821 | 0.1785 | 48.84 | 43.13 | 30.88 | 40.95 | 0.264 | 49.68 |
| <i>psaA</i>  | 0.4465 | 0.2    | 0.3922 | 0.1642 | 52.46 | 43.54 | 33.42 | 43.14 | 0.294 | 51.15 |
| <i>ycf3</i>  | 0.4361 | 0.1805 | 0.437  | 0.2621 | 46.15 | 38.46 | 34.91 | 39.84 | 0.317 | 56.39 |
| <i>rps4</i>  | 0.4843 | 0.1509 | 0.4663 | 0.1409 | 50.25 | 38.42 | 24.14 | 37.6  | 0.227 | 47.88 |
| <i>ndhJ</i>  | 0.5078 | 0.1406 | 0.4128 | 0.2083 | 49.69 | 38.99 | 30.19 | 39.62 | 0.257 | 49.16 |
| <i>ndhK</i>  | 0.4667 | 0.1385 | 0.4343 | 0.1761 | 44.59 | 45.89 | 27.71 | 39.39 | 0.248 | 53.28 |
| <i>ndhC</i>  | 0.5400 | 0.08   | 0.4253 | 0.1644 | 48.76 | 34.71 | 24.79 | 36.09 | 0.18  | 45    |
| <i>atpE</i>  | 0.4766 | 0.1495 | 0.3796 | 0.2021 | 52.24 | 40.3  | 30.60 | 41.04 | 0.276 | 51.34 |
| <i>atpB</i>  | 0.4398 | 0.1794 | 0.4458 | 0.1337 | 55.91 | 41.88 | 27.66 | 41.82 | 0.255 | 45.42 |
| <i>rbcL</i>  | 0.5064 | 0.1979 | 0.3746 | 0.1536 | 58.19 | 43.91 | 30.46 | 44.19 | 0.279 | 48.54 |
| <i>accD</i>  | 0.5644 | 0.1710 | 0.374  | 0.1841 | 39.73 | 34.22 | 28.52 | 34.16 | 0.258 | 49.51 |
| <i>ycf4</i>  | 0.4934 | 0.1711 | 0.3704 | 0.2018 | 43.24 | 40    | 31.89 | 38.38 | 0.282 | 50.57 |
| <i>cemA</i>  | 0.478  | 0.2253 | 0.4151 | 0.1591 | 40.43 | 28.26 | 33.04 | 33.91 | 0.288 | 43.51 |
| <i>petA</i>  | 0.4767 | 0.1977 | 0.358  | 0.2212 | 54.35 | 35.71 | 33.23 | 41.10 | 0.320 | 51.08 |
| <i>rps18</i> | 0.4896 | 0.1250 | 0.3579 | 0.2791 | 39.17 | 40.83 | 31.67 | 37.22 | 0.308 | 42.77 |
| <i>rpl20</i> | 0.4800 | 0.090  | 0.4348 | 0.2267 | 34.75 | 43.22 | 24.58 | 34.18 | 0.228 | 49.77 |
| <i>clpP1</i> | 0.4331 | 0.1592 | 0.4797 | 0.1493 | 58.88 | 38.07 | 28.93 | 41.96 | 0.245 | 54.63 |
| <i>psbB</i>  | 0.4874 | 0.1724 | 0.3566 | 0.1773 | 54.81 | 46.37 | 32.02 | 44.40 | 0.283 | 49.81 |
| <i>petB</i>  | 0.4722 | 0.1833 | 0.3742 | 0.1409 | 49.07 | 41.67 | 32.41 | 41.05 | 0.270 | 45.23 |
| <i>petD</i>  | 0.4275 | 0.1304 | 0.5    | 0.1228 | 50.31 | 38.51 | 24.22 | 37.68 | 0.209 | 38.06 |
| <i>rpoA</i>  | 0.4639 | 0.1559 | 0.51   | 0.1557 | 45.18 | 32.53 | 24.7  | 34.14 | 0.229 | 48.99 |
| <i>rps11</i> | 0.3802 | 0.1818 | 0.4087 | 0.1731 | 53.96 | 56.83 | 32.37 | 47.72 | 0.301 | 44.45 |
| <i>rps8</i>  | 0.4286 | 0.1696 | 0.4434 | 0.1705 | 41.48 | 40.74 | 28.89 | 37.04 | 0.264 | 43.23 |
| <i>rpl14</i> | 0.4356 | 0.1683 | 0.5052 | 0.1098 | 53.66 | 37.40 | 23.58 | 38.21 | 0.218 | 44.68 |
| <i>rpl16</i> | 0.3551 | 0.1682 | 0.5179 | 0.1212 | 51.47 | 52.94 | 28.68 | 44.36 | 0.238 | 39.03 |
| <i>rps3</i>  | 0.4329 | 0.189  | 0.5337 | 0.1156 | 50.45 | 34.23 | 24.77 | 36.49 | 0.224 | 48.34 |
| <i>rpl22</i> | 0.4405 | 0.1905 | 0.4651 | 0.1867 | 35.71 | 36.61 | 30.36 | 34.23 | 0.280 | 49.42 |
| <i>ndhF</i>  | 0.5375 | 0.1072 | 0.4381 | 0.1422 | 35.37 | 35.11 | 22.61 | 31.03 | 0.186 | 43.04 |
| <i>ccsA</i>  | 0.4596 | 0.1434 | 0.4741 | 0.1263 | 34.8  | 37.62 | 26.02 | 32.81 | 0.211 | 47.20 |
| <i>ndhE</i>  | 0.5506 | 0.1461 | 0.3784 | 0.1148 | 40.2  | 34.31 | 24.51 | 33.01 | 0.206 | 51.93 |
| <i>ndhG</i>  | 0.4717 | 0.1258 | 0.3731 | 0.2202 | 42.94 | 35.03 | 28.81 | 35.59 | 0.260 | 49.16 |
| <i>ndhI</i>  | 0.5556 | 0.1556 | 0.4554 | 0.1031 | 43.37 | 36.14 | 23.49 | 34.34 | 0.197 | 44.27 |
| <i>ndhA</i>  | 0.4317 | 0.1556 | 0.4639 | 0.128  | 45.05 | 37.64 | 25.27 | 35.99 | 0.230 | 47.05 |
| <i>ndhH</i>  | 0.4498 | 0.1586 | 0.4772 | 0.1755 | 51.52 | 36.29 | 29.95 | 39.26 | 0.251 | 49.76 |
| <i>ycf1</i>  | 0.473  | 0.1624 | 0.5387 | 0.1819 | 37.12 | 28.04 | 26.5  | 30.55 | 0.241 | 49.03 |
| <i>rps7</i>  | 0.4167 | 0.15   | 0.5194 | 0.1186 | 53.21 | 45.51 | 24.36 | 41.03 | 0.215 | 45.45 |
| <i>ndhB</i>  | 0.4338 | 0.21   | 0.4164 | 0.1384 | 41.29 | 38.75 | 32.09 | 37.38 | 0.282 | 49.06 |
| <i>ycf2</i>  | 0.4394 | 0.2148 | 0.3989 | 0.2630 | 41.44 | 34.24 | 37.14 | 37.61 | 0.347 | 53.26 |

|             |        |        |        |        |       |    |       |       |       |       |
|-------------|--------|--------|--------|--------|-------|----|-------|-------|-------|-------|
| <i>rpl2</i> | 0.4034 | 0.1888 | 0.4404 | 0.1735 | 50.91 | 48 | 30.91 | 43.27 | 0.291 | 51.66 |
|-------------|--------|--------|--------|--------|-------|----|-------|-------|-------|-------|

**Table S2b.** Codon parameter characterization of chloroplast genome of *Q. helferiana*. Abbreviations: ENC (Effective Number of Codon).

| Gene name    | <i>Q. helferiana</i> |        |        |        |         |         |         |            |       |       |
|--------------|----------------------|--------|--------|--------|---------|---------|---------|------------|-------|-------|
|              | T3s                  | C3s    | A3s    | G3s    | GC1 (%) | GC2 (%) | GC3 (%) | GC_all (%) | GC3s  | ENC   |
| <i>psbA</i>  | 0.5493               | 0.2368 | 0.2937 | 0.0811 | 49.44   | 43.5    | 31.64   | 41.53      | 0.272 | 40.77 |
| <i>matK</i>  | 0.4836               | 0.1729 | 0.4377 | 0.202  | 40.59   | 32.67   | 28.91   | 34.06      | 0.274 | 50.89 |
| <i>atpA</i>  | 0.4472               | 0.1709 | 0.4276 | 0.1723 | 55.31   | 39.76   | 28.74   | 41.27      | 0.271 | 48.9  |
| <i>atpF</i>  | 0.3836               | 0.1849 | 0.4414 | 0.2519 | 45.41   | 35.68   | 35.14   | 38.74      | 0.333 | 55.58 |
| <i>atpI</i>  | 0.5094               | 0.1745 | 0.4115 | 0.0904 | 48.79   | 36.29   | 24.19   | 36.42      | 0.218 | 43.86 |
| <i>rps2</i>  | 0.4974               | 0.1257 | 0.4419 | 0.1812 | 43.88   | 40.93   | 27.43   | 37.41      | 0.23  | 48.78 |
| <i>rpoC2</i> | 0.4464               | 0.1603 | 0.4602 | 0.1976 | 45.33   | 37.07   | 28.81   | 37.07      | 0.268 | 49.99 |
| <i>rpoC1</i> | 0.4586               | 0.1639 | 0.4358 | 0.2137 | 50.22   | 37.92   | 30.75   | 39.63      | 0.282 | 51.88 |
| <i>rpoB</i>  | 0.4413               | 0.1385 | 0.4515 | 0.2267 | 50.37   | 37.8    | 29.8    | 39.32      | 0.275 | 50.24 |
| <i>psbD</i>  | 0.4867               | 0.22   | 0.3525 | 0.1435 | 52.26   | 43.22   | 34.18   | 43.22      | 0.299 | 48.67 |
| <i>rps14</i> | 0.3947               | 0.1184 | 0.4878 | 0.2208 | 46.53   | 46.53   | 29.7    | 40.92      | 0.271 | 39.32 |
| <i>psaB</i>  | 0.4968               | 0.1597 | 0.386  | 0.172  | 48.71   | 43.13   | 30.61   | 40.82      | 0.261 | 49.7  |
| <i>psaA</i>  | 0.4458               | 0.1997 | 0.3878 | 0.1701 | 52.33   | 43.68   | 33.69   | 43.23      | 0.298 | 51.27 |
| <i>ycf3</i>  | 0.4361               | 0.1805 | 0.437  | 0.2621 | 46.15   | 38.46   | 34.91   | 39.84      | 0.317 | 56.39 |
| <i>rps4</i>  | 0.4843               | 0.1509 | 0.4601 | 0.1477 | 50.25   | 38.42   | 24.63   | 37.77      | 0.232 | 48.02 |
| <i>ndhJ</i>  | 0.5078               | 0.1406 | 0.4128 | 0.2083 | 49.06   | 38.99   | 30.19   | 39.41      | 0.257 | 50.15 |
| <i>ndhK</i>  | 0.4667               | 0.1385 | 0.44   | 0.1698 | 44.59   | 45.89   | 27.27   | 39.25      | 0.243 | 52.99 |
| <i>ndhC</i>  | 0.54                 | 0.08   | 0.4253 | 0.1644 | 48.76   | 34.71   | 24.79   | 36.09      | 0.18  | 45    |
| <i>atpE</i>  | 0.4766               | 0.1495 | 0.3796 | 0.2021 | 52.24   | 40.3    | 30.6    | 41.04      | 0.276 | 51.34 |
| <i>atpB</i>  | 0.4373               | 0.1818 | 0.4458 | 0.1337 | 55.91   | 41.88   | 27.86   | 41.88      | 0.257 | 45.52 |
| <i>rbcL</i>  | 0.509                | 0.1954 | 0.3775 | 0.1506 | 57.98   | 43.7    | 30.04   | 43.91      | 0.275 | 48.02 |
| <i>accD</i>  | 0.561                | 0.1737 | 0.375  | 0.181  | 39.5    | 34.54   | 28.63   | 34.22      | 0.259 | 49.79 |
| <i>ycf4</i>  | 0.4868               | 0.1776 | 0.3778 | 0.193  | 43.24   | 40      | 31.89   | 38.38      | 0.282 | 52.08 |
| <i>cemA</i>  | 0.4835               | 0.2198 | 0.4151 | 0.1591 | 40.43   | 28.26   | 32.61   | 33.77      | 0.284 | 43.44 |
| <i>petA</i>  | 0.4767               | 0.1977 | 0.3502 | 0.2291 | 54.35   | 36.02   | 33.85   | 41.41      | 0.326 | 51.89 |
| <i>rps18</i> | 0.4896               | 0.125  | 0.3579 | 0.2824 | 38.33   | 40.83   | 31.67   | 36.94      | 0.308 | 42.56 |
| <i>rpl20</i> | 0.48                 | 0.09   | 0.4286 | 0.24   | 34.75   | 43.22   | 25.42   | 34.46      | 0.237 | 51.32 |
| <i>clpP1</i> | 0.4331               | 0.1592 | 0.4797 | 0.1493 | 58.88   | 38.07   | 28.93   | 41.96      | 0.245 | 54.63 |
| <i>psbB</i>  | 0.4874               | 0.1701 | 0.3566 | 0.1802 | 54.81   | 46.37   | 32.02   | 44.4       | 0.283 | 49.66 |
| <i>petB</i>  | 0.4722               | 0.1833 | 0.3742 | 0.1409 | 49.07   | 41.67   | 32.41   | 41.05      | 0.27  | 45.23 |
| <i>petD</i>  | 0.4348               | 0.1232 | 0.4839 | 0.1404 | 50.31   | 38.51   | 24.84   | 37.89      | 0.216 | 37.95 |
| <i>rpoA</i>  | 0.4601               | 0.1597 | 0.51   | 0.1557 | 45.18   | 32.53   | 25      | 34.24      | 0.232 | 48.95 |
| <i>rps11</i> | 0.3802               | 0.1818 | 0.4052 | 0.1714 | 53.96   | 57.55   | 32.37   | 47.96      | 0.301 | 43.91 |
| <i>rps8</i>  | 0.4375               | 0.1607 | 0.4434 | 0.1705 | 41.48   | 40.74   | 28.15   | 36.79      | 0.256 | 43.23 |
| <i>rpl14</i> | 0.4356               | 0.1683 | 0.5052 | 0.1098 | 53.66   | 37.4    | 23.58   | 38.21      | 0.218 | 44.68 |
| <i>rpl16</i> | 0.3611               | 0.1667 | 0.5133 | 0.1212 | 51.47   | 52.94   | 27.94   | 44.12      | 0.236 | 39.09 |
| <i>rps3</i>  | 0.4329               | 0.189  | 0.5337 | 0.1156 | 50.45   | 34.23   | 24.77   | 36.49      | 0.224 | 48.34 |

|             |        |        |        |        |       |       |       |       |       |       |
|-------------|--------|--------|--------|--------|-------|-------|-------|-------|-------|-------|
| <i>ndhF</i> | 0.5422 | 0.1099 | 0.4361 | 0.1384 | 35.03 | 35.03 | 22.48 | 30.85 | 0.186 | 42.66 |
| <i>ccsA</i> | 0.4613 | 0.1439 | 0.4655 | 0.1368 | 34.8  | 37.62 | 26.65 | 33.02 | 0.218 | 48.42 |
| <i>ndhE</i> | 0.5618 | 0.1348 | 0.3784 | 0.1148 | 40.2  | 34.31 | 23.53 | 32.68 | 0.196 | 51.93 |
| <i>ndhG</i> | 0.478  | 0.1195 | 0.3731 | 0.2202 | 42.94 | 35.03 | 28.25 | 35.4  | 0.254 | 49.61 |
| <i>ndhI</i> | 0.5556 | 0.1556 | 0.4554 | 0.1031 | 44.58 | 36.14 | 23.49 | 34.74 | 0.197 | 43.09 |
| <i>ndhA</i> | 0.4286 | 0.1587 | 0.457  | 0.136  | 45.05 | 37.64 | 26.1  | 36.26 | 0.239 | 47.55 |
| <i>ndhH</i> | 0.4513 | 0.1591 | 0.4772 | 0.1755 | 51.02 | 36.04 | 29.95 | 39    | 0.251 | 50.03 |
| <i>ycf1</i> | 0.4713 | 0.1628 | 0.5416 | 0.1802 | 36.8  | 27.93 | 26.4  | 30.38 | 0.24  | 48.62 |
| <i>rps7</i> | 0.4167 | 0.15   | 0.5194 | 0.1186 | 53.21 | 45.51 | 24.36 | 41.03 | 0.215 | 45.45 |
| <i>ndhB</i> | 0.4338 | 0.21   | 0.4164 | 0.1384 | 41.29 | 38.75 | 32.09 | 37.38 | 0.282 | 49.06 |
| <i>ycf2</i> | 0.4402 | 0.2143 | 0.3997 | 0.2617 | 41.48 | 34.24 | 37.05 | 37.59 | 0.346 | 53.31 |
| <i>rpl2</i> | 0.4034 | 0.1888 | 0.4404 | 0.1735 | 50.91 | 48    | 30.91 | 43.27 | 0.291 | 51.66 |

**Table S2c.** Codon parameter characterization of chloroplast genome of *Q. camusiae* and *Q. semiserrata*. Abbreviations: ENC (Effective Number of Codon).

| Gene<br>name | <i>Q. camusiae</i> and <i>Q. semiserrata</i> |        |        |        |         |         |         |            |       |       |
|--------------|----------------------------------------------|--------|--------|--------|---------|---------|---------|------------|-------|-------|
|              | T3s                                          | C3s    | A3s    | G3s    | GC1 (%) | GC2 (%) | GC3 (%) | GC_all (%) | GC3s  | ENC   |
| <i>psbA</i>  | 0.5493                                       | 0.2368 | 0.2937 | 0.0811 | 49.44   | 43.5    | 31.64   | 41.53      | 0.272 | 40.77 |
| <i>matK</i>  | 0.4791                                       | 0.1791 | 0.438  | 0.1967 | 40.83   | 32.94   | 29.19   | 34.32      | 0.277 | 51.36 |
| <i>atpA</i>  | 0.4497                                       | 0.1683 | 0.4276 | 0.1719 | 55.51   | 39.76   | 28.54   | 41.27      | 0.269 | 48.49 |
| <i>atpF</i>  | 0.3836                                       | 0.1849 | 0.4514 | 0.2462 | 45.41   | 34.59   | 34.59   | 38.2       | 0.328 | 56.03 |
| <i>atpI</i>  | 0.5189                                       | 0.1698 | 0.4063 | 0.0898 | 49.19   | 36.29   | 23.79   | 36.42      | 0.213 | 43.7  |
| <i>rps2</i>  | 0.4921                                       | 0.1257 | 0.4503 | 0.1837 | 43.04   | 40.51   | 27.43   | 36.99      | 0.23  | 47.57 |
| <i>rpoC2</i> | 0.4452                                       | 0.1608 | 0.4594 | 0.1978 | 45.4    | 37.28   | 28.74   | 37.14      | 0.269 | 50.22 |
| <i>rpoC1</i> | 0.4632                                       | 0.1618 | 0.4327 | 0.2132 | 50.07   | 38.21   | 30.45   | 39.58      | 0.281 | 51.59 |
| <i>rpoB</i>  | 0.442                                        | 0.1383 | 0.4522 | 0.2248 | 50.37   | 37.52   | 29.61   | 39.17      | 0.274 | 49.78 |
| <i>psbD</i>  | 0.4867                                       | 0.22   | 0.3484 | 0.1478 | 52.26   | 43.22   | 34.46   | 43.31      | 0.302 | 48.69 |
| <i>rps14</i> | 0.3947                                       | 0.1184 | 0.4878 | 0.2208 | 46.53   | 47.52   | 29.7    | 41.25      | 0.271 | 38.42 |
| <i>psaB</i>  | 0.5016                                       | 0.155  | 0.384  | 0.1742 | 48.71   | 43.13   | 30.34   | 40.73      | 0.258 | 49.48 |
| <i>psaA</i>  | 0.4465                                       | 0.2    | 0.3866 | 0.1705 | 52.33   | 43.54   | 33.82   | 43.23      | 0.298 | 51.85 |
| <i>ycf3</i>  | 0.4361                                       | 0.1805 | 0.4407 | 0.2647 | 45.56   | 38.46   | 34.91   | 39.64      | 0.317 | 55.98 |
| <i>rps4</i>  | 0.478                                        | 0.1572 | 0.4724 | 0.1342 | 50.25   | 38.42   | 24.14   | 37.6       | 0.227 | 49.16 |
| <i>ndhJ</i>  | 0.5039                                       | 0.1395 | 0.4091 | 0.2165 | 50.31   | 38.99   | 30.19   | 39.83      | 0.262 | 49.9  |
| <i>ndhK</i>  | 0.4667                                       | 0.1385 | 0.44   | 0.1698 | 44.59   | 45.89   | 27.27   | 39.25      | 0.243 | 52.99 |
| <i>ndhC</i>  | 0.54                                         | 0.08   | 0.4253 | 0.1667 | 47.93   | 34.71   | 24.79   | 35.81      | 0.18  | 45.21 |
| <i>atpE</i>  | 0.4766                                       | 0.1495 | 0.3796 | 0.2021 | 52.24   | 40.3    | 30.6    | 41.04      | 0.276 | 51.34 |
| <i>atpB</i>  | 0.4447                                       | 0.1744 | 0.4458 | 0.1337 | 55.91   | 41.88   | 27.25   | 41.68      | 0.251 | 45.1  |
| <i>rbcL</i>  | 0.5064                                       | 0.1979 | 0.3775 | 0.1506 | 57.98   | 43.7    | 30.25   | 43.98      | 0.277 | 48.15 |
| <i>accD</i>  | 0.56                                         | 0.1765 | 0.3764 | 0.1795 | 39.39   | 34.8    | 28.87   | 34.35      | 0.26  | 49.73 |
| <i>ycf4</i>  | 0.4868                                       | 0.1776 | 0.3778 | 0.1913 | 43.78   | 40      | 31.89   | 38.56      | 0.282 | 51.94 |
| <i>cemA</i>  | 0.4754                                       | 0.2295 | 0.4177 | 0.1527 | 40.43   | 28.26   | 33.04   | 33.91      | 0.288 | 43.56 |
| <i>petA</i>  | 0.4767                                       | 0.1977 | 0.3541 | 0.2267 | 54.04   | 35.71   | 33.54   | 41.1       | 0.323 | 51.32 |
| <i>rps18</i> | 0.4896                                       | 0.125  | 0.3474 | 0.2941 | 38.33   | 40.83   | 32.5    | 37.22      | 0.316 | 43.05 |



|              |        |        |        |        |       |       |       |       |       |       |
|--------------|--------|--------|--------|--------|-------|-------|-------|-------|-------|-------|
| <i>rpl20</i> | 0.48   | 0.08   | 0.4348 | 0.24   | 34.75 | 42.37 | 24.58 | 33.9  | 0.228 | 50.52 |
| <i>clpP1</i> | 0.4331 | 0.1592 | 0.4797 | 0.1493 | 58.88 | 38.07 | 28.93 | 41.96 | 0.245 | 54.63 |
| <i>psbB</i>  | 0.4874 | 0.1701 | 0.3539 | 0.1831 | 54.81 | 46.37 | 32.22 | 44.47 | 0.285 | 49.72 |
| <i>petB</i>  | 0.4722 | 0.1778 | 0.3804 | 0.1409 | 49.07 | 41.67 | 31.94 | 40.9  | 0.265 | 45.3  |
| <i>petD</i>  | 0.442  | 0.1159 | 0.5    | 0.1228 | 50.31 | 38.51 | 22.98 | 37.27 | 0.196 | 37.1  |
| <i>rpoA</i>  | 0.4601 | 0.1597 | 0.51   | 0.1557 | 45.18 | 32.53 | 25    | 34.24 | 0.232 | 48.95 |
| <i>rps11</i> | 0.3802 | 0.1818 | 0.4052 | 0.1714 | 53.96 | 57.55 | 32.37 | 47.96 | 0.301 | 43.91 |
| <i>rps8</i>  | 0.4425 | 0.1593 | 0.4381 | 0.1724 | 41.48 | 40.74 | 28.15 | 36.79 | 0.256 | 42.19 |
| <i>rpl14</i> | 0.4356 | 0.1683 | 0.5052 | 0.1098 | 53.66 | 37.4  | 23.58 | 38.21 | 0.218 | 44.68 |
| <i>rpl16</i> | 0.3551 | 0.1682 | 0.5179 | 0.1212 | 51.47 | 52.94 | 28.68 | 44.36 | 0.238 | 39.03 |
| <i>rps3</i>  | 0.4294 | 0.1902 | 0.5367 | 0.1156 | 50.45 | 34.23 | 25.23 | 36.64 | 0.225 | 48.41 |
| <i>ndhF</i>  | 0.5354 | 0.1108 | 0.4417 | 0.1361 | 35.51 | 34.98 | 22.56 | 31.02 | 0.186 | 43.08 |
| <i>ccsA</i>  | 0.4615 | 0.1392 | 0.4721 | 0.1316 | 35    | 37.5  | 25.94 | 32.81 | 0.211 | 47.5  |
| <i>ndhE</i>  | 0.5618 | 0.1348 | 0.3919 | 0.0984 | 40.2  | 34.31 | 22.55 | 32.35 | 0.186 | 51.93 |
| <i>ndhG</i>  | 0.481  | 0.1203 | 0.3731 | 0.2202 | 42.94 | 34.46 | 28.25 | 35.22 | 0.254 | 47.86 |
| <i>ndhI</i>  | 0.5556 | 0.1481 | 0.4643 | 0.1031 | 43.98 | 36.14 | 22.89 | 34.34 | 0.191 | 42.1  |
| <i>ndhA</i>  | 0.4317 | 0.1556 | 0.4639 | 0.128  | 45.05 | 37.64 | 25.27 | 35.99 | 0.23  | 47.05 |
| <i>ndhH</i>  | 0.4628 | 0.1553 | 0.4789 | 0.1639 | 50.76 | 36.04 | 28.93 | 38.58 | 0.24  | 49.35 |
| <i>ycf1</i>  | 0.4743 | 0.1629 | 0.532  | 0.1877 | 37.16 | 27.95 | 27    | 30.7  | 0.245 | 48.99 |
| <i>rps7</i>  | 0.4167 | 0.15   | 0.5194 | 0.1186 | 53.21 | 45.51 | 24.36 | 41.03 | 0.215 | 45.45 |
| <i>ndhB</i>  | 0.4315 | 0.21   | 0.4164 | 0.1415 | 41.29 | 38.75 | 32.29 | 37.44 | 0.284 | 49.32 |
| <i>ycf2</i>  | 0.44   | 0.2142 | 0.3997 | 0.2624 | 41.48 | 34.28 | 37.05 | 37.61 | 0.346 | 53.29 |
| <i>rpl2</i>  | 0.4034 | 0.1888 | 0.4404 | 0.1735 | 50.91 | 48    | 30.91 | 43.27 | 0.291 | 51.66 |

**Table S3:** The relative synonymous codon usage in four chloroplast genomes of *Quercus* section *Cyclobalanopsis*.

| Types | <i>Q. poilanei</i> | <i>Q. helferiana</i> | <i>Q. camusiae</i> | <i>Q. semiserrata</i> |
|-------|--------------------|----------------------|--------------------|-----------------------|
| GCA   | 1.1069             | 1.0995               | 1.1164             | 1.1164                |
| GCC   | 0.611              | 0.6184               | 0.6073             | 0.6073                |
| GCG   | 0.5031             | 0.4955               | 0.4836             | 0.4836                |
| GCU   | 1.779              | 1.7866               | 1.7927             | 1.7927                |
| UGC   | 0.5565             | 0.5526               | 0.5487             | 0.5487                |
| UGU   | 1.4435             | 1.4474               | 1.4513             | 1.4513                |
| GAC   | 0.3803             | 0.3807               | 0.3818             | 0.3818                |
| GAU   | 1.6197             | 1.6193               | 1.6182             | 1.6182                |
| GAA   | 1.5284             | 1.5221               | 1.5154             | 1.5154                |
| GAG   | 0.4716             | 0.4779               | 0.4846             | 0.4846                |
| UUC   | 0.6732             | 0.6691               | 0.6727             | 0.6727                |
| UUU   | 1.3268             | 1.3309               | 1.3273             | 1.3273                |
| GGA   | 1.5065             | 1.4989               | 1.5058             | 1.5058                |
| GGC   | 0.4849             | 0.4939               | 0.474              | 0.474                 |
| GGG   | 0.703              | 0.7018               | 0.6936             | 0.6936                |
| GGU   | 1.3056             | 1.3054               | 1.3266             | 1.3266                |
| CAC   | 0.4587             | 0.4568               | 0.4523             | 0.4523                |

|     |        |        |        |        |
|-----|--------|--------|--------|--------|
| CAU | 1.5413 | 1.5432 | 1.5477 | 1.5477 |
| AUA | 0.9503 | 0.9496 | 0.9555 | 0.9555 |
| AUC | 0.5765 | 0.5748 | 0.5733 | 0.5733 |
| AUU | 1.4732 | 1.4756 | 1.4713 | 1.4713 |
| AAA | 1.5121 | 1.5159 | 1.508  | 1.508  |
| AAG | 0.4879 | 0.4841 | 0.492  | 0.492  |
| CUA | 0.8034 | 0.8    | 0.793  | 0.793  |
| CUC | 0.3932 | 0.3943 | 0.3894 | 0.3894 |
| CUG | 0.4017 | 0.3915 | 0.4036 | 0.4036 |
| CUU | 1.2107 | 1.217  | 1.2136 | 1.2136 |
| UUA | 1.9604 | 1.9546 | 1.9668 | 1.9668 |
| UUG | 1.2306 | 1.2426 | 1.2335 | 1.2335 |
| AAC | 0.4513 | 0.4535 | 0.4575 | 0.4575 |
| AAU | 1.5487 | 1.5465 | 1.5425 | 1.5425 |
| CCA | 1.0835 | 1.0734 | 1.1005 | 1.1005 |
| CCC | 0.8162 | 0.8183 | 0.823  | 0.823  |
| CCG | 0.5871 | 0.6065 | 0.5789 | 0.5789 |
| CCU | 1.5131 | 1.5018 | 1.4976 | 1.4976 |
| CAA | 1.5448 | 1.5341 | 1.5422 | 1.5422 |
| CAG | 0.4552 | 0.4659 | 0.4578 | 0.4578 |
| AGA | 1.8377 | 1.8465 | 1.8215 | 1.8215 |
| AGG | 0.6457 | 0.6455 | 0.6505 | 0.6505 |
| CGA | 1.346  | 1.3561 | 1.3511 | 1.3511 |
| CGC | 0.4023 | 0.3953 | 0.4103 | 0.4103 |
| CGG | 0.447  | 0.4504 | 0.4554 | 0.4554 |
| CGU | 1.3212 | 1.3061 | 1.3111 | 1.3111 |
| AGC | 0.3758 | 0.3682 | 0.3699 | 0.3699 |
| AGU | 1.2404 | 1.234  | 1.2358 | 1.2358 |
| UCA | 1.1758 | 1.1895 | 1.1951 | 1.1951 |
| UCC | 1.0101 | 1.0074 | 0.9959 | 0.9959 |
| UCG | 0.5859 | 0.5624 | 0.5569 | 0.5569 |
| UCU | 1.6121 | 1.6386 | 1.6463 | 1.6463 |
| ACA | 1.2348 | 1.2295 | 1.2167 | 1.2167 |
| ACC | 0.7113 | 0.7066 | 0.7038 | 0.7038 |
| ACG | 0.4396 | 0.4431 | 0.4533 | 0.4533 |
| ACU | 1.6144 | 1.6208 | 1.6262 | 1.6262 |
| GUA | 1.5501 | 1.5556 | 1.5354 | 1.5354 |
| GUC | 0.4625 | 0.4627 | 0.4682 | 0.4682 |
| GUG | 0.5528 | 0.5574 | 0.5662 | 0.5662 |
| GUU | 1.4345 | 1.4244 | 1.4301 | 1.4301 |
| UAC | 0.4264 | 0.4215 | 0.4235 | 0.4235 |
| UAU | 1.5736 | 1.5785 | 1.5765 | 1.5765 |

---

**Table S4:** Likelihood ratio test (LRT) and positive selection sites under different site models of PCGs of four *Quercus* section *Cyclobalanopsis*.

| Genes        | Model Comparison | df | $\Delta\ln L$ | $2\Delta\ln L$ | LRT (P-value) | Positively selected sites (BEB: *: P>95%; **: P>99%)                                                                                                                                 |
|--------------|------------------|----|---------------|----------------|---------------|--------------------------------------------------------------------------------------------------------------------------------------------------------------------------------------|
| <i>atpF</i>  | M0 vs M3         | 4  | 36.484478     | 72.968956      | 5.36E-15      |                                                                                                                                                                                      |
|              | M1 vs M2         | 2  | 21.965641     | 43.931282      | 2.89E-10      | 17A (0.621),49S (0.996**),50D (0.993**),52N (0.994**),54R (1.000**),104N (0.545)                                                                                                     |
|              | M7 vs M8         | 2  | 22.022258     | 44.044516      | 2.73E-10      | 17A (0.674),49S (0.998**),50D (0.997**),52N (0.998**),54R (1.000**),104N (0.598)                                                                                                     |
| <i>ndhA</i>  | M0 vs M3         | 4  | 5.597318      | 11.194636      | 0.024461501   |                                                                                                                                                                                      |
|              | M1 vs M2         | 2  | 3.645198      | 7.290396       | 0.026116238   | 34L (0.526),280I (0.640), 281S (0.851)                                                                                                                                               |
|              | M7 vs M8         | 2  | 3.701774      | 7.403548       | 0.024679706   | 34L (0.592),280I (0.693),281S (0.897)                                                                                                                                                |
| <i>ndhD</i>  | M0 vs M3         | 4  | 13.663614     | 27.327228      | 1.71E-05      |                                                                                                                                                                                      |
|              | M1 vs M2         | 2  | 9.273251      | 18.546502      | 9.39E-05      | 75D (0.939),201V (0.572),364T (0.592),408Q (0.609),409N (0.937),499L (0.990*)                                                                                                        |
|              | M7 vs M8         | 2  | 6.203671      | 12.407342      | 0.002021994   | 75D (0.966*),201V (0.657),364T (0.672),408Q (0.688),409N (0.966*),499L (0.996**)                                                                                                     |
| <i>ndhF</i>  | M0 vs M3         | 4  | 5.786362      | 11.572724      | 0.020828209   |                                                                                                                                                                                      |
|              | M1 vs M2         | 2  | 4.261784      | 8.523568       | 0.014097131   | 487N (0.686),745K (0.945)                                                                                                                                                            |
|              | M7 vs M8         | 2  | 4.16729       | 8.33458        | 0.015494193   | 59S(0.569),222N(0.564),376D(0.560),383L(0.548),424T(0.560),457Y(0.569),487N(0.788),489P(0.576),571Q(0.608),575G(0.572),582S(0.606),652V(0.543),741L(0.565),743F(0.598),745K (0.972*) |
| <i>ndhK</i>  | M0 vs M3         | 4  | 5.049127      | 10.098254      | 0.038804734   |                                                                                                                                                                                      |
|              | M1 vs M2         | 2  | 3.672552      | 7.345104       | 0.025411537   | 15Q (0.777)                                                                                                                                                                          |
|              | M7 vs M8         | 2  | 3.691397      | 7.382794       | 0.024937141   | 15Q (0.882)                                                                                                                                                                          |
| <i>petB</i>  | M0 vs M3         | 4  | 4.761273      | 9.522546       | 0.049286033   |                                                                                                                                                                                      |
|              | M1 vs M2         | 2  | 3.725946      | 7.451892       | 0.0240903     | 1V (0.791)                                                                                                                                                                           |
|              | M7 vs M8         | 2  | 3.730301      | 7.460602       | 0.023985615   | 1V (0.891)                                                                                                                                                                           |
| <i>petD</i>  | M0 vs M3         | 4  | 21.745095     | 43.49019       | 8.19E-09      |                                                                                                                                                                                      |
|              | M1 vs M2         | 2  | 11.904026     | 23.808052      | 6.76E-06      | 1M (0.938),2G (0.999**),3V (0.989*)                                                                                                                                                  |
|              | M7 vs M8         | 2  | 11.999172     | 23.998344      | 6.15E-06      | 1M (0.964*),2G (1.000**),3V (0.994**)                                                                                                                                                |
| <i>rbcL</i>  | M0 vs M3         | 4  | 10.081759     | 20.163518      | 0.000463614   |                                                                                                                                                                                      |
|              | M1 vs M2         | 2  | 7.528338      | 15.056676      | 0.000537631   | 219V (0.960*),328A (0.514)                                                                                                                                                           |
|              | M7 vs M8         | 2  | 7.764799      | 15.529598      | 0.000424415   | 219V (0.982*),262A (0.593),328A (0.623)                                                                                                                                              |
| <i>rpl22</i> | M0 vs M3         | 4  | 7.293626      | 14.587252      | 0.005638491   |                                                                                                                                                                                      |
|              | M1 vs M2         | 2  | 0.55532       | 1.11064        | 0.573888587   | 6K (0.965*)                                                                                                                                                                          |
|              | M7 vs M8         | 2  | 6.775851      | 13.551702      | 0.001140999   | 6K (0.995**),7R (0.561),9I(0.502),10E(0.541),15C (0.577),37S (0.721),50E (0.526),53L (0.651),59E (0.533)                                                                             |
| <i>ycf1</i>  | M0 vs M3         | 4  | 105.976296    | 211.952592     | 1.01E-44      |                                                                                                                                                                                      |
|              | M1 vs M2         | 2  | 83.329584     | 166.659168     | 6.46E-37      | 3L(0.541),163K(0.532),242V(0.526),249E(0.949),400R(0.565),449S(0.558),499C(0.530),506L(0.578),533F(0.509),542R(0.585),573F(0.556),592K(0.528),598L(0.543),650L(0.503),7              |

|             |          |   |           |            |          |                                                                                                                                                                                                                                                                                                                                                                                                                                                                                                                                                                                                                                                                       |
|-------------|----------|---|-----------|------------|----------|-----------------------------------------------------------------------------------------------------------------------------------------------------------------------------------------------------------------------------------------------------------------------------------------------------------------------------------------------------------------------------------------------------------------------------------------------------------------------------------------------------------------------------------------------------------------------------------------------------------------------------------------------------------------------|
|             |          |   |           |            |          | 32P(0.599),743F(0.946),777K(0.553),978F(0.523),1249R(0.561),1271Y(0.511),1366Y(0.519),1405S(0.532),1489Q(1.000**),1490G(1.000**),1491F(1.000**),1492F(0.996**),1493F(0.995**),1518F(0.511),1543V(0.508),1561P(0.512),1570L(0.556),1575Q(0.519),1589P(0.547),1597V(0.524),1643Q(0.519),1684D(0.516),1803T(0.554),1814C(0.591)                                                                                                                                                                                                                                                                                                                                          |
|             |          |   |           |            |          | 3L(0.698),163K(0.690),242V(0.685),249E(0.981*),346D(0.621),347K(0.635),400R(0.720),449S(0.713),499C(0.688),506L(0.731),533F(0.669),542R(0.737),555K(0.626),556M(0.645),573F(0.712),592K(0.685),598L(0.700),618D(0.643),650L(0.662),732P(0.749),743F(0.980*),767I(0.635),777K(0.709),917R(0.651),957I(0.638),978F(0.681),1061I(0.640),1084R(0.657),1189S(0.651),1249R(0.716),1271Y(0.670),1366Y(0.678),1405S(0.690),1489Q(1.000**),1490G(1.000**),1491F(1.000*),1492F(0.999**),1493F(0.999**),1518F(0.670),1540D(0.632),1543V(0.668),1561P(0.672),1570L(0.712),1574N(0.623),1575Q(0.678),1589P(0.704),1597V(0.683),1643Q(0.678),1684D(0.675),1803T(0.710),1814C(0.742) |
|             | M7 vs M8 | 2 | 83.756869 | 167.513738 | 4.22E-37 |                                                                                                                                                                                                                                                                                                                                                                                                                                                                                                                                                                                                                                                                       |
|             | M0 vs M3 | 4 | 40.067163 | 80.134326  | 1.63E-16 |                                                                                                                                                                                                                                                                                                                                                                                                                                                                                                                                                                                                                                                                       |
| <i>ycf3</i> | M1 vs M2 | 2 | 30.357823 | 60.715646  | 6.54E-14 | 103L(0.890),118R(1.000**),119G(0.988*),120E(1.000**),121Q(0.991**)                                                                                                                                                                                                                                                                                                                                                                                                                                                                                                                                                                                                    |
|             | M7 vs M8 | 2 | 30.36522  | 60.73044   | 6.49E-14 | 103L(0.939),118R(1.000**),119G(0.995**),120E(1.000**),121Q(0.996**)                                                                                                                                                                                                                                                                                                                                                                                                                                                                                                                                                                                                   |
